# Supplementary material for: Unveiling the Biogeography and Potential Functions of the Intestinal Digesta- and Mucosa-Associated Microbiome of Donkeys
Source: PubMed Central journal article supplement (PMC7793809; doi:10.3389/fmicb.2020.596882), 2020-12-04
Supplement: Data_Sheet_2.pdf [file Data_Sheet_2.pdf]

## Supplementary Material

Table S1 Affected sub-pathways belonging to the top 10 pathways at KEGG level 2 in the digesta-associated microbiota. Numbers in the same row with different superscripts indicate a significant difference ( $P < 0.05$ ).

| KEGG_Pathways                                       | Jejunum            | Ileum              | Caecum             | Colon              | SEM   | <i>P</i> value |
|-----------------------------------------------------|--------------------|--------------------|--------------------|--------------------|-------|----------------|
| <b>Amino Acid Metabolism</b>                        |                    |                    |                    |                    |       |                |
| Amino acid related enzymes                          | 1.43 <sup>b</sup>  | 1.43 <sup>b</sup>  | 1.52 <sup>a</sup>  | 1.53 <sup>a</sup>  | 0.011 | <0.001         |
| Arginine and proline metabolism                     | 1.13 <sup>b</sup>  | 1.09 <sup>b</sup>  | 1.26 <sup>a</sup>  | 1.25 <sup>a</sup>  | 0.015 | <0.001         |
| Alanine, aspartate and glutamate metabolism         | 1.00 <sup>b</sup>  | 0.97 <sup>b</sup>  | 1.09 <sup>a</sup>  | 1.1 <sup>a</sup>   | 0.012 | <0.001         |
| Cysteine and methionine metabolism                  | 0.91 <sup>c</sup>  | 0.93 <sup>bc</sup> | 0.96 <sup>ab</sup> | 0.97 <sup>a</sup>  | 0.006 | <0.001         |
| Phenylalanine, tyrosine and tryptophan biosynthesis | 0.77 <sup>b</sup>  | 0.72 <sup>b</sup>  | 0.92 <sup>a</sup>  | 0.93 <sup>a</sup>  | 0.018 | <0.001         |
| Valine, leucine and isoleucine biosynthesis         | 0.71 <sup>b</sup>  | 0.67 <sup>b</sup>  | 0.79 <sup>a</sup>  | 0.78 <sup>a</sup>  | 0.011 | <0.001         |
| Histidine metabolism                                | 0.58 <sup>b</sup>  | 0.56 <sup>b</sup>  | 0.66 <sup>a</sup>  | 0.66 <sup>a</sup>  | 0.010 | <0.001         |
| Valine, leucine and isoleucine degradation          | 0.38 <sup>a</sup>  | 0.32 <sup>a</sup>  | 0.24 <sup>b</sup>  | 0.23 <sup>b</sup>  | 0.015 | <0.001         |
| Tyrosine metabolism                                 | 0.37 <sup>a</sup>  | 0.39 <sup>a</sup>  | 0.3 <sup>b</sup>   | 0.30 <sup>b</sup>  | 0.008 | <0.001         |
| Tryptophan metabolism                               | 0.27 <sup>a</sup>  | 0.22 <sup>ab</sup> | 0.18 <sup>b</sup>  | 0.17 <sup>b</sup>  | 0.010 | <0.001         |
| Lysine degradation                                  | 0.22 <sup>a</sup>  | 0.18 <sup>ab</sup> | 0.13 <sup>b</sup>  | 0.13 <sup>b</sup>  | 0.009 | <0.001         |
| Lysine biosynthesis                                 | 0.77 <sup>b</sup>  | 0.76 <sup>b</sup>  | 0.82 <sup>a</sup>  | 0.82 <sup>a</sup>  | 0.007 | 0.002          |
| Glycine, serine and threonine metabolism            | 0.82 <sup>ab</sup> | 0.8 <sup>b</sup>   | 0.85 <sup>a</sup>  | 0.84 <sup>ab</sup> | 0.007 | 0.009          |
| <b>Carbohydrate Metabolism</b>                      |                    |                    |                    |                    |       |                |
| Butanoate metabolism                                | 0.74 <sup>a</sup>  | 0.72 <sup>a</sup>  | 0.63 <sup>b</sup>  | 0.63 <sup>b</sup>  | 0.012 | <0.001         |
| Propanoate metabolism                               | 0.65 <sup>a</sup>  | 0.59 <sup>a</sup>  | 0.5 <sup>b</sup>   | 0.51 <sup>b</sup>  | 0.012 | <0.001         |
| C5-Branched dibasic acid metabolism                 | 0.29 <sup>b</sup>  | 0.27 <sup>b</sup>  | 0.32 <sup>a</sup>  | 0.32 <sup>a</sup>  | 0.005 | <0.001         |
| Citrate cycle (TCA cycle)                           | 0.66 <sup>ab</sup> | 0.64 <sup>b</sup>  | 0.72 <sup>a</sup>  | 0.71 <sup>ab</sup> | 0.010 | 0.006          |
| Galactose metabolism                                | 0.63 <sup>b</sup>  | 0.66 <sup>ab</sup> | 0.73 <sup>a</sup>  | 0.72 <sup>ab</sup> | 0.012 | 0.019          |
| Glycolysis / Gluconeogenesis                        | 1.13 <sup>ab</sup> | 1.19 <sup>a</sup>  | 1.09 <sup>ab</sup> | 1.09 <sup>b</sup>  | 0.013 | 0.022          |
| Starch and sucrose metabolism                       | 0.88 <sup>b</sup>  | 0.95 <sup>ab</sup> | 0.98 <sup>ab</sup> | 0.97 <sup>a</sup>  | 0.014 | 0.026          |
| Pentose and glucuronate interconversions            | 0.43 <sup>b</sup>  | 0.47 <sup>ab</sup> | 0.47 <sup>a</sup>  | 0.46 <sup>ab</sup> | 0.008 | 0.044          |
| <b>Energy Metabolism</b>                            |                    |                    |                    |                    |       |                |
| Methane metabolism                                  | 1.2 <sup>b</sup>   | 1.17 <sup>b</sup>  | 1.31 <sup>a</sup>  | 1.33 <sup>a</sup>  | 0.015 | <0.001         |
| Oxidative phosphorylation                           | 1.16 <sup>ab</sup> | 1.07 <sup>b</sup>  | 1.26 <sup>a</sup>  | 1.24 <sup>a</sup>  | 0.018 | <0.001         |
| Carbon fixation pathways in prokaryotes             | 1.01 <sup>a</sup>  | 0.98 <sup>a</sup>  | 1.1 <sup>b</sup>   | 1.1 <sup>b</sup>   | 0.011 | <0.001         |
| Carbon fixation in photosynthetic organisms         | 0.59 <sup>b</sup>  | 0.58 <sup>b</sup>  | 0.63 <sup>a</sup>  | 0.63 <sup>a</sup>  | 0.005 | <0.001         |
| Nitrogen metabolism                                 | 0.71 <sup>b</sup>  | 0.71 <sup>b</sup>  | 0.75 <sup>ab</sup> | 0.77 <sup>a</sup>  | 0.007 | 0.002          |
| <b>Enzyme Families</b>                              |                    |                    |                    |                    |       |                |
| Peptidases                                          | 1.78 <sup>b</sup>  | 1.82 <sup>ab</sup> | 1.92 <sup>a</sup>  | 1.92 <sup>a</sup>  | 0.015 | 0.002          |
| <b>Lipid Metabolism</b>                             |                    |                    |                    |                    |       |                |
| Fatty acid metabolism                               | 0.36 <sup>a</sup>  | 0.31 <sup>a</sup>  | 0.23 <sup>b</sup>  | 0.23 <sup>ab</sup> | 0.013 | <0.001         |
| Fatty acid biosynthesis                             | 0.51 <sup>a</sup>  | 0.51 <sup>ab</sup> | 0.48 <sup>b</sup>  | 0.48 <sup>ab</sup> | 0.004 | 0.003          |
| Glycerolipid metabolism                             | 0.39 <sup>a</sup>  | 0.39 <sup>a</sup>  | 0.37 <sup>ab</sup> | 0.36 <sup>b</sup>  | 0.004 | 0.004          |
| Biosynthesis of unsaturated fatty acids             | 0.17 <sup>a</sup>  | 0.16 <sup>ab</sup> | 0.14 <sup>ab</sup> | 0.14 <sup>b</sup>  | 0.005 | 0.031          |

**Metabolism of Cofactors and Vitamins**

|                                   |                    |                   |                   |                    |       |        |
|-----------------------------------|--------------------|-------------------|-------------------|--------------------|-------|--------|
| Pantothenate and CoA biosynthesis | 0.62 <sup>b</sup>  | 0.59 <sup>b</sup> | 0.69 <sup>a</sup> | 0.7 <sup>a</sup>   | 0.009 | <0.001 |
| One carbon pool by folate         | 0.59 <sup>b</sup>  | 0.59 <sup>b</sup> | 0.7 <sup>a</sup>  | 0.7 <sup>a</sup>   | 0.010 | <0.001 |
| Thiamine metabolism               | 0.49 <sup>b</sup>  | 0.48 <sup>b</sup> | 0.53 <sup>a</sup> | 0.52 <sup>a</sup>  | 0.005 | <0.001 |
| Vitamin B6 metabolism             | 0.19 <sup>b</sup>  | 0.17 <sup>b</sup> | 0.21 <sup>a</sup> | 0.21 <sup>a</sup>  | 0.004 | <0.001 |
| Biotin metabolism                 | 0.15 <sup>ab</sup> | 0.14 <sup>b</sup> | 0.18 <sup>a</sup> | 0.18 <sup>a</sup>  | 0.004 | <0.001 |
| Folate biosynthesis               | 0.4 <sup>b</sup>   | 0.39 <sup>b</sup> | 0.44 <sup>a</sup> | 0.44 <sup>ab</sup> | 0.007 | 0.003  |

**Replication and Repair**

|                            |                   |                    |                    |                    |       |       |
|----------------------------|-------------------|--------------------|--------------------|--------------------|-------|-------|
| DNA replication proteins   | 1.18 <sup>b</sup> | 1.2 <sup>ab</sup>  | 1.28 <sup>a</sup>  | 1.29 <sup>a</sup>  | 0.013 | 0.002 |
| Mismatch repair            | 0.81 <sup>b</sup> | 0.82 <sup>ab</sup> | 0.86 <sup>ab</sup> | 0.86 <sup>a</sup>  | 0.008 | 0.015 |
| Nucleotide excision repair | 0.39 <sup>b</sup> | 0.4 <sup>ab</sup>  | 0.42 <sup>a</sup>  | 0.42 <sup>ab</sup> | 0.004 | 0.027 |

**Membrane Transport**

|                                 |                    |                    |                   |                    |       |        |
|---------------------------------|--------------------|--------------------|-------------------|--------------------|-------|--------|
| Transporters                    | 6.25 <sup>ac</sup> | 6.55 <sup>a</sup>  | 5.57 <sup>b</sup> | 5.57 <sup>bc</sup> | 0.106 | <0.001 |
| ABC transporters                | 3.27 <sup>a</sup>  | 3.41 <sup>a</sup>  | 2.83 <sup>b</sup> | 2.83 <sup>b</sup>  | 0.066 | <0.001 |
| Phosphotransferase system (PTS) | 0.47 <sup>a</sup>  | 0.6 <sup>a</sup>   | 0.22 <sup>b</sup> | 0.21 <sup>b</sup>  | 0.034 | <0.001 |
| Secretion system                | 1.49 <sup>a</sup>  | 1.41 <sup>ab</sup> | 1.29 <sup>b</sup> | 1.29 <sup>b</sup>  | 0.028 | 0.003  |

---

Table S2 Affected sub-pathways belonging to the top 10 pathways at KEGG level 2 in the mucosa-associated microbiota. Numbers in the same row with different superscripts indicate a significant difference ( $P < 0.05$ ).

| KEGG_Pathways                                       | Jejunum            | Ileum             | Caecum             | Colon              | SEM   | <i>P</i> |
|-----------------------------------------------------|--------------------|-------------------|--------------------|--------------------|-------|----------|
| <b>Amino Acid Metabolism</b>                        |                    |                   |                    |                    |       |          |
| Phenylalanine, tyrosine and tryptophan biosynthesis | 0.87 <sup>ab</sup> | 0.84 <sup>b</sup> | 0.89 <sup>ab</sup> | 0.91 <sup>a</sup>  | 0.009 | 0.017    |
| Tyrosine metabolism                                 | 0.34 <sup>ab</sup> | 0.36 <sup>a</sup> | 0.32 <sup>b</sup>  | 0.31 <sup>b</sup>  | 0.008 | 0.019    |
| Valine, leucine and isoleucine biosynthesis         | 0.76 <sup>ab</sup> | 0.76 <sup>b</sup> | 0.79 <sup>a</sup>  | 0.78 <sup>ab</sup> | 0.005 | 0.03     |
| <b>Carbohydrate Metabolism</b>                      |                    |                   |                    |                    |       |          |
| C5-Branched dibasic acid metabolism                 | 0.32 <sup>b</sup>  | 0.32 <sup>b</sup> | 0.34 <sup>a</sup>  | 0.33 <sup>ab</sup> | 0.003 | 0.019    |
| Glycolysis / Gluconeogenesis                        | 1.09 <sup>a</sup>  | 1.09 <sup>a</sup> | 1.03 <sup>b</sup>  | 1.06 <sup>ab</sup> | 0.006 | 0.011    |
| <b>Metabolism of Cofactors and Vitamins</b>         |                    |                   |                    |                    |       |          |
| Biotin metabolism                                   | 0.16 <sup>a</sup>  | 0.16 <sup>a</sup> | 0.19 <sup>b</sup>  | 0.18 <sup>ab</sup> | 0.003 | 0.017    |
| Pantothenate and CoA biosynthesis                   | 0.65 <sup>ab</sup> | 0.64 <sup>b</sup> | 0.66 <sup>ab</sup> | 0.68 <sup>a</sup>  | 0.005 | 0.027    |
| <b>Membrane Transport</b>                           |                    |                   |                    |                    |       |          |
| Phosphotransferase system (PTS)                     | 0.30 <sup>ab</sup> | 0.34 <sup>a</sup> | 0.26 <sup>b</sup>  | 0.27 <sup>ab</sup> | 0.01  | 0.028    |

Table S3 Correlation between the abundance (relative abundance >1% in at least in one location) and significantly affected microbial genera and KEGG pathways of the mucosa-associated microbiota. Only correlation coefficients with *P* value <0.05 and  $|r|>0.5$  are presented.

| Genus         | KEGG pathway                                        | KO numbers | Correlation coefficient | P Value |
|---------------|-----------------------------------------------------|------------|-------------------------|---------|
| Lactobacillus | Glycolysis / Gluconeogenesis                        | ko00010    | 0.71                    | <0.001  |
| Lactobacillus | Valine, leucine and isoleucine biosynthesis         | ko00290    | -0.65                   | <0.001  |
| Lactobacillus | C5-Branched dibasic acid metabolism                 | ko00660    | -0.63                   | <0.001  |
| Lactobacillus | Phosphotransferase system (PTS)                     | ko02060    | 0.59                    | <0.001  |
| Streptococcus | Glycolysis / Gluconeogenesis                        | ko00010    | 0.73                    | <0.001  |
| Streptococcus | Phosphotransferase system (PTS)                     | ko02060    | 0.61                    | <0.001  |
| Streptococcus | Valine, leucine and isoleucine biosynthesis         | ko00290    | -0.52                   | 0.001   |
| Sphingomonas  | Tyrosine metabolism                                 | ko00350    | 0.78                    | <0.001  |
| Sphingomonas  | Pantothenate and CoA biosynthesis                   | ko00770    | -0.58                   | <0.001  |
| Sphingomonas  | Phenylalanine, tyrosine and tryptophan biosynthesis | ko00400    | -0.52                   | <0.001  |
| Sphingomonas  | Valine, leucine and isoleucine biosynthesis         | ko00290    | 0.51                    | <0.001  |
| Campylobacter | Glycolysis / Gluconeogenesis                        | ko00010    | -0.62                   | <0.001  |
| Campylobacter | Biotin metabolism                                   | ko00780    | 0.61                    | <0.001  |
| Helicobacter  | Biotin metabolism                                   | ko00780    | 0.64                    | <0.001  |
